1 **COVID-19 presenting as anosmia and dysgeusia in New York City emergency**  
2 **departments, March - April, 2020**

3  
4 Tina Z. Wang, MD, MS<sup>1</sup>, Jessica Sell, MPH<sup>2</sup>, Don Weiss, MD, MPH<sup>2</sup>, Ramona Lall,  
5 PhD<sup>2</sup>

6

7 **Affiliations:**

8 1. Department of Medicine, Division of Infectious Diseases, Weill Cornell Medicine,  
9 New York, NY

10 2. New York City Department of Health and Mental Hygiene, New York, NY

11

12 **Corresponding Author:**

13 Don Weiss, MD, MPH

14 Bureau of Communicable Disease

15 New York City Department of Health and Mental Hygiene

16 Gotham Center, CN# 22a

17 42-09 28th Street, 6th Floor

18 Queens, New York 11101-4132

19 (347) 396-2626

20 [DWeiss@health.nyc.gov](mailto:DWeiss@health.nyc.gov)

21 **Abstract**

22 **Background:** Increasing evidence has been emerging of anosmia and dysgeusia as  
23 frequently reported symptoms in COVID-19. Improving our understanding of these  
24 presenting symptoms may facilitate the prompt recognition of the disease in emergency  
25 departments and prevent further transmission.

26 **Methods:** We examined a cross-sectional cohort using New York City emergency  
27 department syndromic surveillance data for March and April 2020. Emergency  
28 department visits for anosmia and/or dysgeusia were identified and subsequently  
29 matched to the Electronic Clinical Laboratory Reporting System to determine testing  
30 results for SARS-CoV-2.

31 **Results:** Of the 683 patients with anosmia and/or dysgeusia included, SARS-CoV-2  
32 testing was performed for 232 (34%) and 168 (72%) were found to be positive. Median  
33 age of all patients presenting with anosmia and/or dysgeusia symptoms was 38, and 54%  
34 were female. Anosmia and/or dysgeusia was the sole complaint of 158 (23%) patients,  
35 of whom 35 were tested for SARS-CoV-2 and 23 (66%) were positive. While the  
36 remaining patients presented with at least one other symptom, nearly half of all patients  
37 (n=334, 49%) and more than a third of those who tested positive (n=62, 37%) did not  
38 have any of the CDC-established symptoms used for screening of COVID-19 such as  
39 fever, cough, shortness of breath, or sore throat.

40 **Conclusions and Relevance:** Anosmia and/or dysgeusia have been frequent  
41 complaints among patients presenting to emergency departments during the COVID-19  
42 pandemic, and, while only a small proportion of patients ultimately underwent testing for

43 SARS-CoV-19, the majority of patients tested have been positive. Anosmia and  
44 dysgeusia likely represent underrecognized symptoms of COVID-19 but may have  
45 important future implications in disease diagnosis and surveillance.

46 **Introduction:**

47 In March 2020, new anecdotal evidence emerged of anosmia and dysgeusia as  
48 important clinical features of COVID-19 infection. A letter by Dr. Claire Hopkins,  
49 president of the British Rhinological Society, to ENT UK described patients presenting  
50 with anosmia and/or dysgeusia early in the course of COVID-19 infection and  
51 occasionally in the absence of respiratory symptoms [1]. These findings have  
52 subsequently been reported by researchers in several countries. In a review of  
53 neurological manifestations of COVID-19 in China, 12 of 214 (5.6%) patients reported  
54 hypogeusia and 11 (5.1%) reported hyposmia [2]. A retrospective survey in Italy found  
55 20 of 59 (33.9%) hospitalized COVID-19 patients reported olfactory or taste dysfunction  
56 and 11 (18.6%) reported both [3]. Similar reports have also been published from France,  
57 Iran, and South Korea [4,5,6].

58  
59 These accruing findings have prompted experts and medical societies to propose  
60 screening and testing of individuals with anosmia and/or dysgeusia [7]. In response, the  
61 American Academy of Otolaryngology-Head and Neck Surgery has collected and  
62 analyzed 237 cases of anosmia and/or dysgeusia from around the world. The majority  
63 (73%) of patients reported anosmia onset prior to COVID-19 diagnosis and 27%  
64 reported no other symptoms [6]. A New York Times article published March 22, 2020  
65 brought further attention to this issue [8]. In late April 2020, the Centers for Disease  
66 Control and Prevention (CDC) added “new loss of taste or smell” to the symptoms to  
67 watch for in COVID-19 [9].

68

69 New York City (NYC) has been the epicenter of the COVID-19 pandemic in the United  
70 States. Rapid recognition and triage of cases in emergency departments (EDs) is  
71 crucial to the control of the outbreak. In order to establish the role of anosmia and  
72 dysgeusia in the identification of COVID-19, we reviewed the prevalence of these chief  
73 complaints in ED visits and results of testing for SARS-CoV-2.

74

#### 75 **Data and Methods:**

76 NYC's Department of Health and Mental Hygiene (DOHMH) receives ED syndromic  
77 surveillance data from all 53 acute care hospital EDs in NYC. By conducting word  
78 analysis of chief complaints, we are able to detect new or increasing mentions of  
79 individual words. On March 15, 2020, we detected increased mentions of the words  
80 "taste" and "smell."

81

82 We analyzed ED data for March and April 2020. Cases were identified by searching  
83 chief complaints for mentions of "anosmia", "ageusia", "loss  
84 of/no/decreased/disturbance/difficulty/unable to taste or smell" utilizing perl regular  
85 expressions in R to account for misspellings and differences in sentence  
86 structure. Cases were also identified by searching International Classification of  
87 Diseases, 10th Revision (ICD-10) discharge diagnosis codes for R43 "Disturbances of  
88 Smell and Taste."

89

90 To determine whether identified cases underwent SARS-CoV-2 PCR testing and the  
91 testing result, we matched cases to the Electronic Clinical Laboratory Reporting System

92 (ECLRS) by using patient name, date of birth, and sex. Definitive name-based matching  
93 was performed for 376 (55%) cases. For cases where patient name was unavailable,  
94 matching was done using patient date of birth, sex, and ZIP code of residence along  
95 with laboratory specimen collection  $\pm 7$  days from the ED visit date. The latter method  
96 was successful in matching cases with an error rate of 8%.

97  
98 Data compilations, descriptive statistics, and visualizations were conducted using R.  
99 The study was evaluated by the NYC DOHMH Institutional Review Board and deemed  
100 to be exempt as public health surveillance.

101

## 102 **Results:**

103 A total of 715 patients presented to NYC EDs in March and April 2020 with a complaint  
104 of anosmia and/or dysgeusia. Of these, 683 from 47 hospitals were NYC residents and  
105 were included in our analysis. For comparison, there was an average of 22 visits for  
106 anosmia and/or dysgeusia in March and April of the previous 5 years (2015 through  
107 2019). Visits for anosmia and/or dysgeusia increased following the publication of Dr.  
108 Hopkin's letter and the New York Times article (**Figure 1**), with the majority (72%) of all  
109 visits occurring between March 22 and April 11, 2020.

110

## 111 **Figure 1. Daily NYC ED Visits for Anosmia and/or Dysgeusia Stratified by Testing.**

112

113 Of the 683 patients, we identified SARS-CoV-2 results for 232 (34%) and 168 (72%)  
114 were confirmed positive. This represents 0.1% of the 175,316 positive SARS-CoV-2

115 tests in March and April 2020. Demographic and clinical characteristic are summarized  
 116 in **Table 1**. Median age of all patients was 38 years with the majority under the age of  
 117 45 (425, 63%). Female patients comprised a slight majority (366, 54%). Forty-three (6%)  
 118 of the 683 anosmia and/or dysgeusia were admitted.

119

120 **Table 1. Demographic and Clinical Characteristics.**

| <b>Demographic and Clinical Characteristics</b> |                 |                 |                          |                 |
|-------------------------------------------------|-----------------|-----------------|--------------------------|-----------------|
|                                                 | <b>Total</b>    |                 | <b>COVID-19 positive</b> |                 |
| <b><i>Demographics</i></b>                      | <b><i>N</i></b> | <b><i>%</i></b> | <b><i>N</i></b>          | <b><i>%</i></b> |
| Age                                             | 683             | 38(median)      | 168                      | 44(median)      |
| 3-17                                            | 18              | 3%              | 1                        | 1%              |
| 18-44                                           | 407             | 60%             | 85                       | 51%             |
| 45-64                                           | 206             | 30%             | 61                       | 36%             |
| 65-74                                           | 43              | 6%              | 19                       | 11%             |
| 75+                                             | 9               | 1%              | 2                        | 1%              |
| Sex - Female                                    | 366             | 54%             | 94                       | 56%             |
| Borough (County)                                |                 |                 |                          |                 |
| Bronx                                           | 150             | 22%             | 28                       | 17%             |
| Brooklyn                                        | 277             | 41%             | 77                       | 46%             |
| Manhattan                                       | 98              | 14%             | 27                       | 16%             |
| Queens                                          | 123             | 18%             | 26                       | 15%             |
| Staten Island                                   | 35              | 5%              | 10                       | 6%              |
| Race                                            |                 |                 |                          |                 |

|                               |          |               |          |               |
|-------------------------------|----------|---------------|----------|---------------|
| Asian                         | 14       | 2%            | 6        | 4%            |
| Black or African American     | 272      | 40%           | 71       | 42%           |
| White                         | 85       | 12%           | 23       | 14%           |
| Other                         | 259      | 38%           | 56       | 33%           |
| Unknown                       | 53       | 8%            | 12       | 7%            |
| <b>Ethnicity</b>              |          |               |          |               |
| Hispanic                      | 154      | 23%           | 38       | 23%           |
| Non-Hispanic                  | 362      | 53%           | 99       | 59%           |
| Unknown                       | 167      | 24%           | 10       | 6%            |
| <b>Vital Signs</b>            |          |               |          |               |
|                               | <b>N</b> | <b>Median</b> | <b>N</b> | <b>Median</b> |
| Temperature                   | 565      | 98.5          | 147      | 98.6          |
| Temp $\geq$ 100.4F            | 44       |               | 19       |               |
| Heart Rate                    | 347      | 87            | 86       | 89.5          |
| Tachycardia ( $\geq$ 100/min) | 75       |               | 25       |               |
| Respiratory rate              | 375      | 18            | 90       | 18            |
| Tachypnea ( $\geq$ 20/min)    | 105      |               | 41       |               |
| Oxygen Saturation             | 487      | 98            | 121      | 98            |
| Hypoxemia ( $<$ 95%)          | 27       |               | 12       |               |
| Systolic BP                   | 401      | 127           | 93       | 126           |
| Diastolic BP                  | 404      | 80            | 94       | 79            |
| <b>Symptoms</b>               |          |               |          |               |
|                               | <b>N</b> | <b>%</b>      | <b>N</b> | <b>%</b>      |



|                                                  |     |     |    |     |
|--------------------------------------------------|-----|-----|----|-----|
| No other symptoms                                | 158 | 23% | 23 | 14% |
| Anosmia alone                                    | 35  | 5%  | 8  | 5%  |
| Dysgeusia alone                                  | 24  | 4%  | 1  | 1%  |
| Both anosmia and dysgeusia                       | 99  | 14% | 14 | 8%  |
| Other symptoms                                   |     |     |    |     |
| Cough                                            | 221 | 32% | 68 | 40% |
| Fever                                            | 184 | 27% | 67 | 40% |
| Shortness of Breath                              | 142 | 21% | 51 | 30% |
| Headache                                         | 85  | 12% | 17 | 10% |
| Nausea, Vomiting, Diarrhea, or<br>Abdominal Pain | 77  | 11% | 23 | 14% |
| Bodyache                                         | 75  | 11% | 23 | 14% |
| Malaise or Fatigue                               | 73  | 11% | 21 | 13% |
| Chest pain                                       | 67  | 10% | 25 | 15% |
| Sore throat                                      | 44  | 6%  | 12 | 7%  |
| Nasal congestion                                 | 37  | 5%  | 9  | 5%  |
| Chills                                           | 35  | 5%  | 13 | 8%  |
| Dizziness or Syncope                             | 25  | 4%  | 7  | 4%  |

121

122 One hundred and fifty-eight (23%) patients presented with anosmia or dysgeusia in the

123 absence of any other reported symptoms. Of these, 35 were tested for SARS-CoV-2

124 and 23 (66%) tested positive. Anosmia alone was seen in 35 (5%) of COVID-19 visits

125 and 8 (5%) positive cases, while dysgeusia alone was the presenting complaint in 24

126 (4%) COVID-19 visits and 1 (1%) positive case. The remaining patients reported  
127 anosmia and/or dysgeusia in addition to at least one other symptom. Only 349 (51%) of  
128 all patients and 106 (63%) of those who tested positive presented with one or more  
129 CDC-established symptoms recommended for screening of COVID-19 disease (cough,  
130 fever, shortness of breath, or sore throat) (**Figure 2**).

131

132 **Figure 2. Daily NYC ED Visits for Anosmia and/or Dysgeusia Stratified by**  
133 **Presence of Other Symptoms.**

134

135 Among the 238 patients who underwent SARS-CoV-2 testing, 16 (7%) had testing  
136 performed prior to presenting with anosmia and/or dysgeusia symptoms and 124 (52%)  
137 received testing during the same ED visit. The remaining 98 (41%) underwent testing at  
138 a subsequent healthcare encounter a median of 7 days after their initial anosmia and/or  
139 dysgeusia ED visit and 56 (57%) were found to be SARS-CoV-2 positive.

140

141 **Discussion:**

142 Anosmia and dysgeusia have been uncommon complaints of persons presenting to  
143 NYC EDs in previous years. Our data show that reports of these symptoms dramatically  
144 increased in late March 2020 yet testing of patients with these complaints remained low.  
145 While only 34% of these patients underwent testing for COVID-19, the majority (72%) of  
146 those tested were positive for the infection. Of those tested, only 52% appeared to be  
147 tested as part of their ED visit. It is possible that patients presenting to EDs with  
148 anosmia and dysgeusia were milder cases who did not meet stricter testing criteria. Our

149 study demonstrates that among those that did get tested there was a high percentage  
150 positive, suggesting anosmia and dysgeusia are reliable symptoms for COVID-19, and  
151 confirming findings of prior studies. Awareness of these symptoms as potential signs of  
152 COVID-19 only recently emerged with the modification of CDC's symptom list in late  
153 April. With further knowledge and expanded future testing, the proportion of persons  
154 with anosmia and/or dysgeusia may represent an even larger population than our study  
155 was able to capture.

156  
157 Our findings support previous reports that anosmia and/or dysgeusia may be a frequent  
158 complaint among patients with COVID-19 and may present in the absence of other  
159 symptoms [1, 3, 6]. A significant proportion presented without classic respiratory illness  
160 symptoms of cough, fever, and shortness of breath, and were not tested for SARS-CoV-  
161 2. As our study shows, this presentation may be especially important in younger, female  
162 patients, which is in contrast to characteristics of COVID-19-infected patients in the  
163 general population who are older and predominantly male [10].

164  
165 Some experts have projected that COVID-19 may eventually assume a seasonal  
166 pattern of outbreaks similar to influenza. If a future resurgence of COVID-19 occurs  
167 during influenza season, discrimination of the two infections may be hindered by the  
168 commonality between their presenting symptoms. Anosmia and dysgeusia, which some  
169 propose to be caused by direct damage to olfactory and gustatory receptors by SARS-  
170 CoV-2, may be key in distinguishing COVID-19 from other influenza-like illnesses in ED

171 settings [6,11]. Furthermore, the tracking of anosmia and dysgeusia complaints may  
172 play an important role in alerting public health agencies to impending outbreaks.

173  
174 Our study was limited by its nature as a surveillance study. The data collected on  
175 symptoms were drawn from ED medical records rather than patient interview and may  
176 not reflect all of a patient's complaints. Six hospitals did not contribute any patients. This  
177 could either represent a lack of COVID-19 suspect cases at these hospitals or failure of  
178 the syndrome definition to capture them. Additionally, patient name for matching to  
179 laboratory records was only available for 55% of our cases. The remaining cases  
180 utilized other demographic data to match to SARS-CoV-2 test results in ECLRS, which  
181 likely led to a small number of mismatches. Lastly, shortages in testing availability and  
182 strict testing criteria throughout NYC in March and April of 2020 likely limited the ability  
183 to determine the true number of SARS-CoV-2 positive cases.

184  
185 To date, understanding of the pathogenesis, prevalence, and importance of these  
186 symptoms remain incomplete. As our knowledge of COVID-19 evolves, we hope that  
187 findings from this study will improve our understanding of the significance of non-  
188 respiratory symptoms in COVID-19 and help to inform public health decisions.

189 **References:**

190

191 1. Hopkins C. Available at:

192 <https://www.entuk.org/sites/default/files/files/Loss%20of%20sense%20of%20smell%20as%20marker%20of%20COVID.pdf>. Accessed April 27.

194 2. Mao L, Jin H, Wang M, et al. Neurologic Manifestations of Hospitalized Patients  
195 With Coronavirus Disease 2019 in Wuhan, China. *JAMA Neurol* **2020**.

196 3. Giacomelli A, Pezzati L, Conti F, et al. Self-reported olfactory and taste disorders  
197 in SARS-CoV-2 patients: a cross-sectional study. *Clin Infect Dis* **2020**.

198 4. Klopfenstein T, Kadiane-Oussou NJ, Toko L, et al. Features of anosmia in  
199 COVID-19. *Med Mal Infect* **2020**.

200 5. Bagheri SHR, Asghari AM, Farhadi M, et al. Coincidence of COVID-19 epidemic  
201 and olfactory dysfunction outbreak. *medRxiv* **2020**: 2020.03.23.20041889.

202 6. Kaye R, Chang D, Kazahaya K, Brereton J, Denny J. COVID-19 Anosmia  
203 Reporting Tool: Initial Findings Otolaryngology-Head and Neck Surgery **2020**.

204 7. American Academy of Otolaryngology-Head and Neck Surgery. Coronavirus  
205 Disease 2019: Resources. Available at:  
206 <https://www.entnet.org/content/coronavirus-disease-2019-resources>. Accessed  
207 April 27.

208 8. Rabin RC. Lost Sense of Smell May be Peculiar Clue to Coronavirus Infection.  
209 *New York Times*. **2020** March 22, 2020.

- 210 9. Center for Disease Control and Prevention. Symptoms of Coronavirus. Available  
211 at: <https://www.cdc.gov/coronavirus/2019-ncov/symptoms-testing/symptoms.html>.  
212 Accessed April 27.
- 213 10. Richardson S, Hirsch JS, Narasimhan M, et al. Presenting Characteristics,  
214 Comorbidities, and Outcomes Among 5700 Patients Hospitalized With COVID-19  
215 in the New York City Area. *JAMA* **2020**.
- 216 11. Temmel AF, Quint C, Schickinger-Fischer B, Klimek L, Stoller E, Hummel T.  
217 Characteristics of olfactory disorders in relation to major causes of olfactory loss.  
218 *Arch Otolaryngol Head Neck Surg* **2002**; 128(6): 635-41.

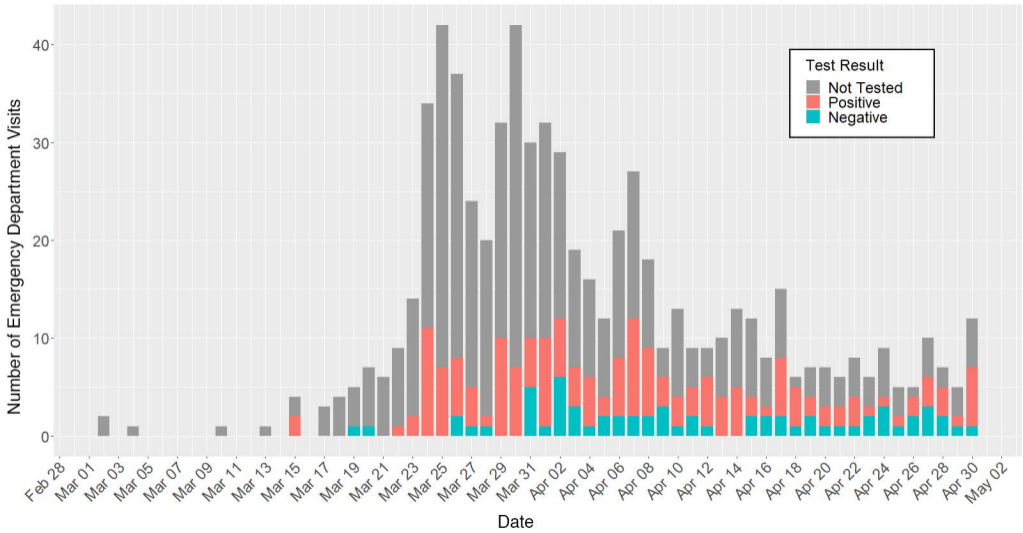

### A All Patients

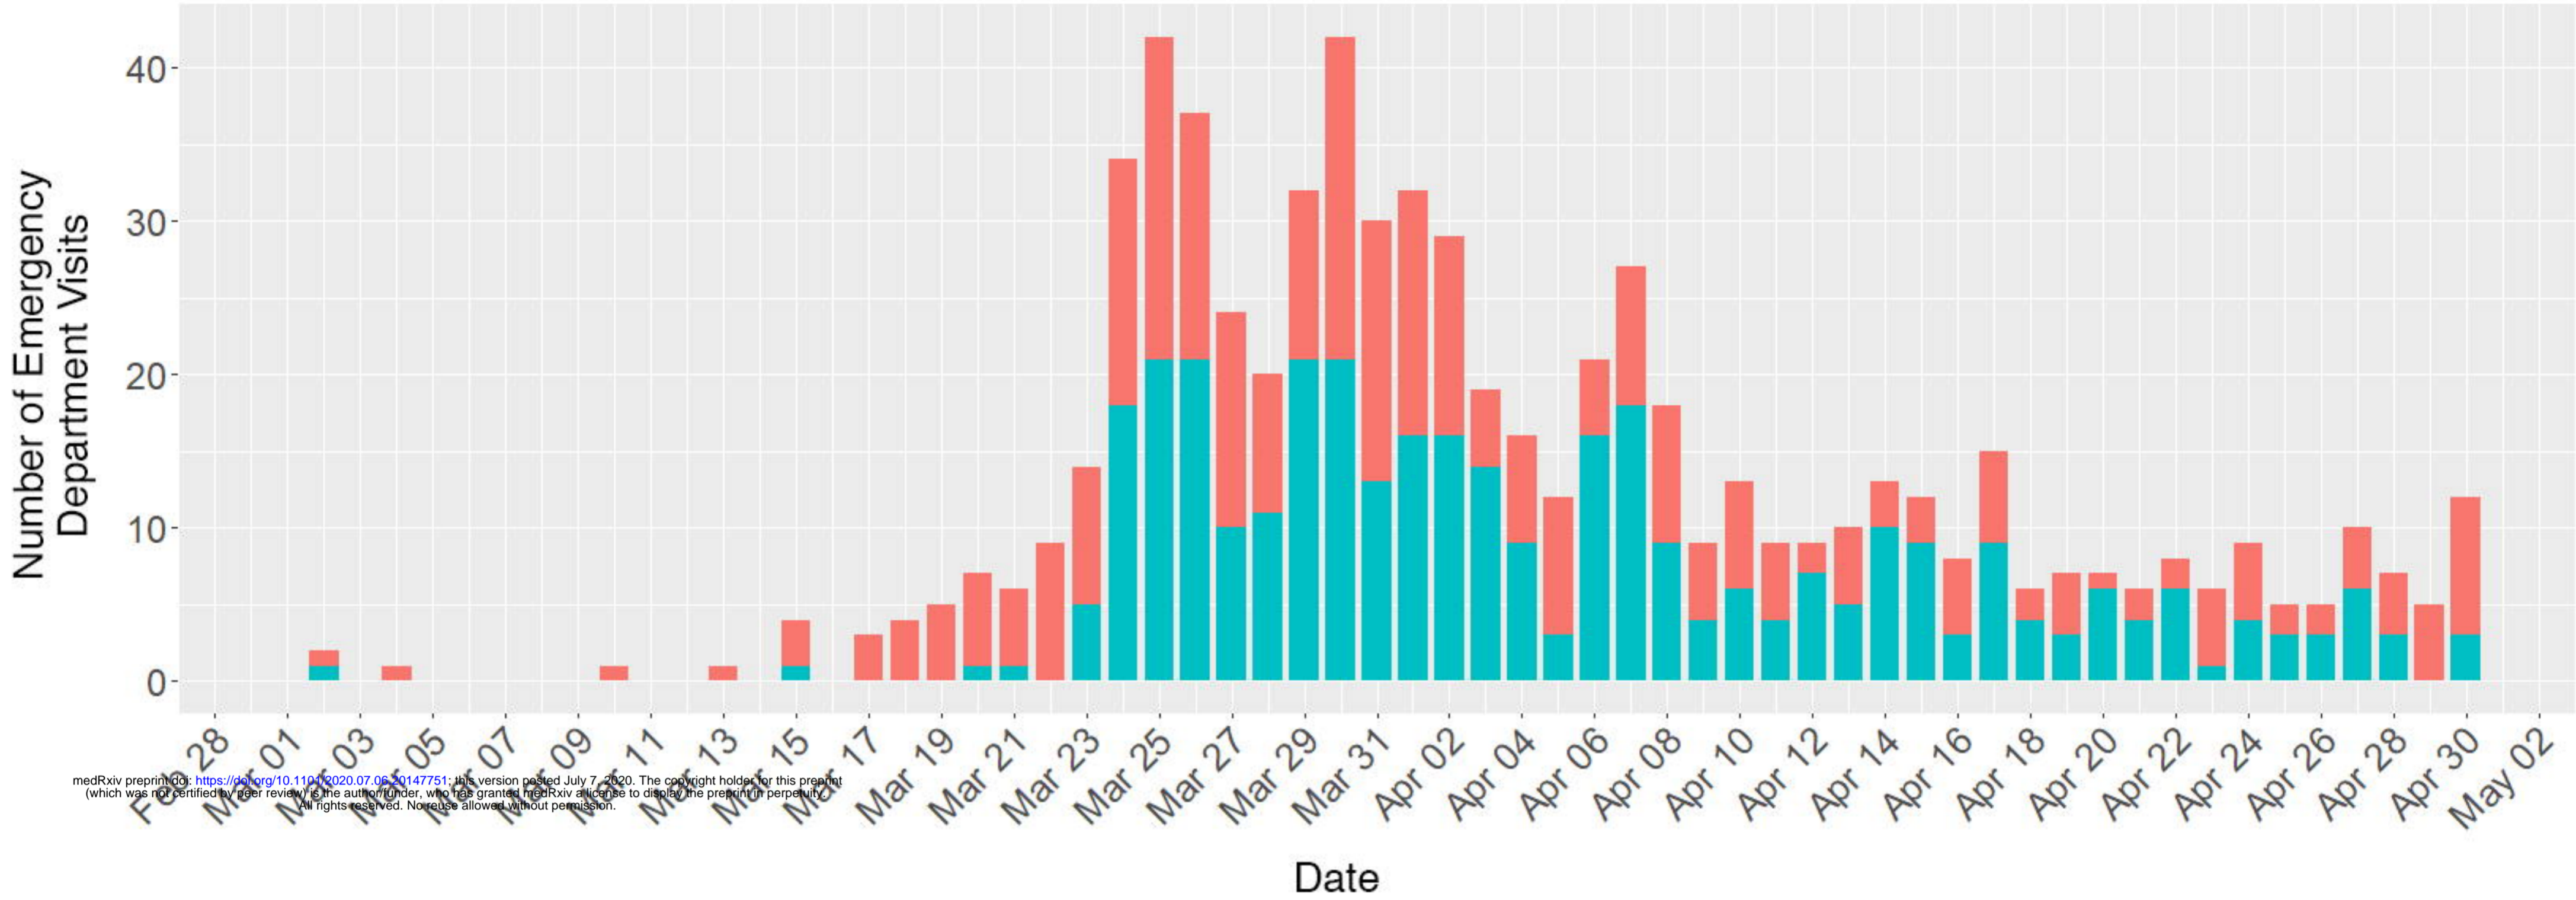

### B COVID-19 Positive Patients

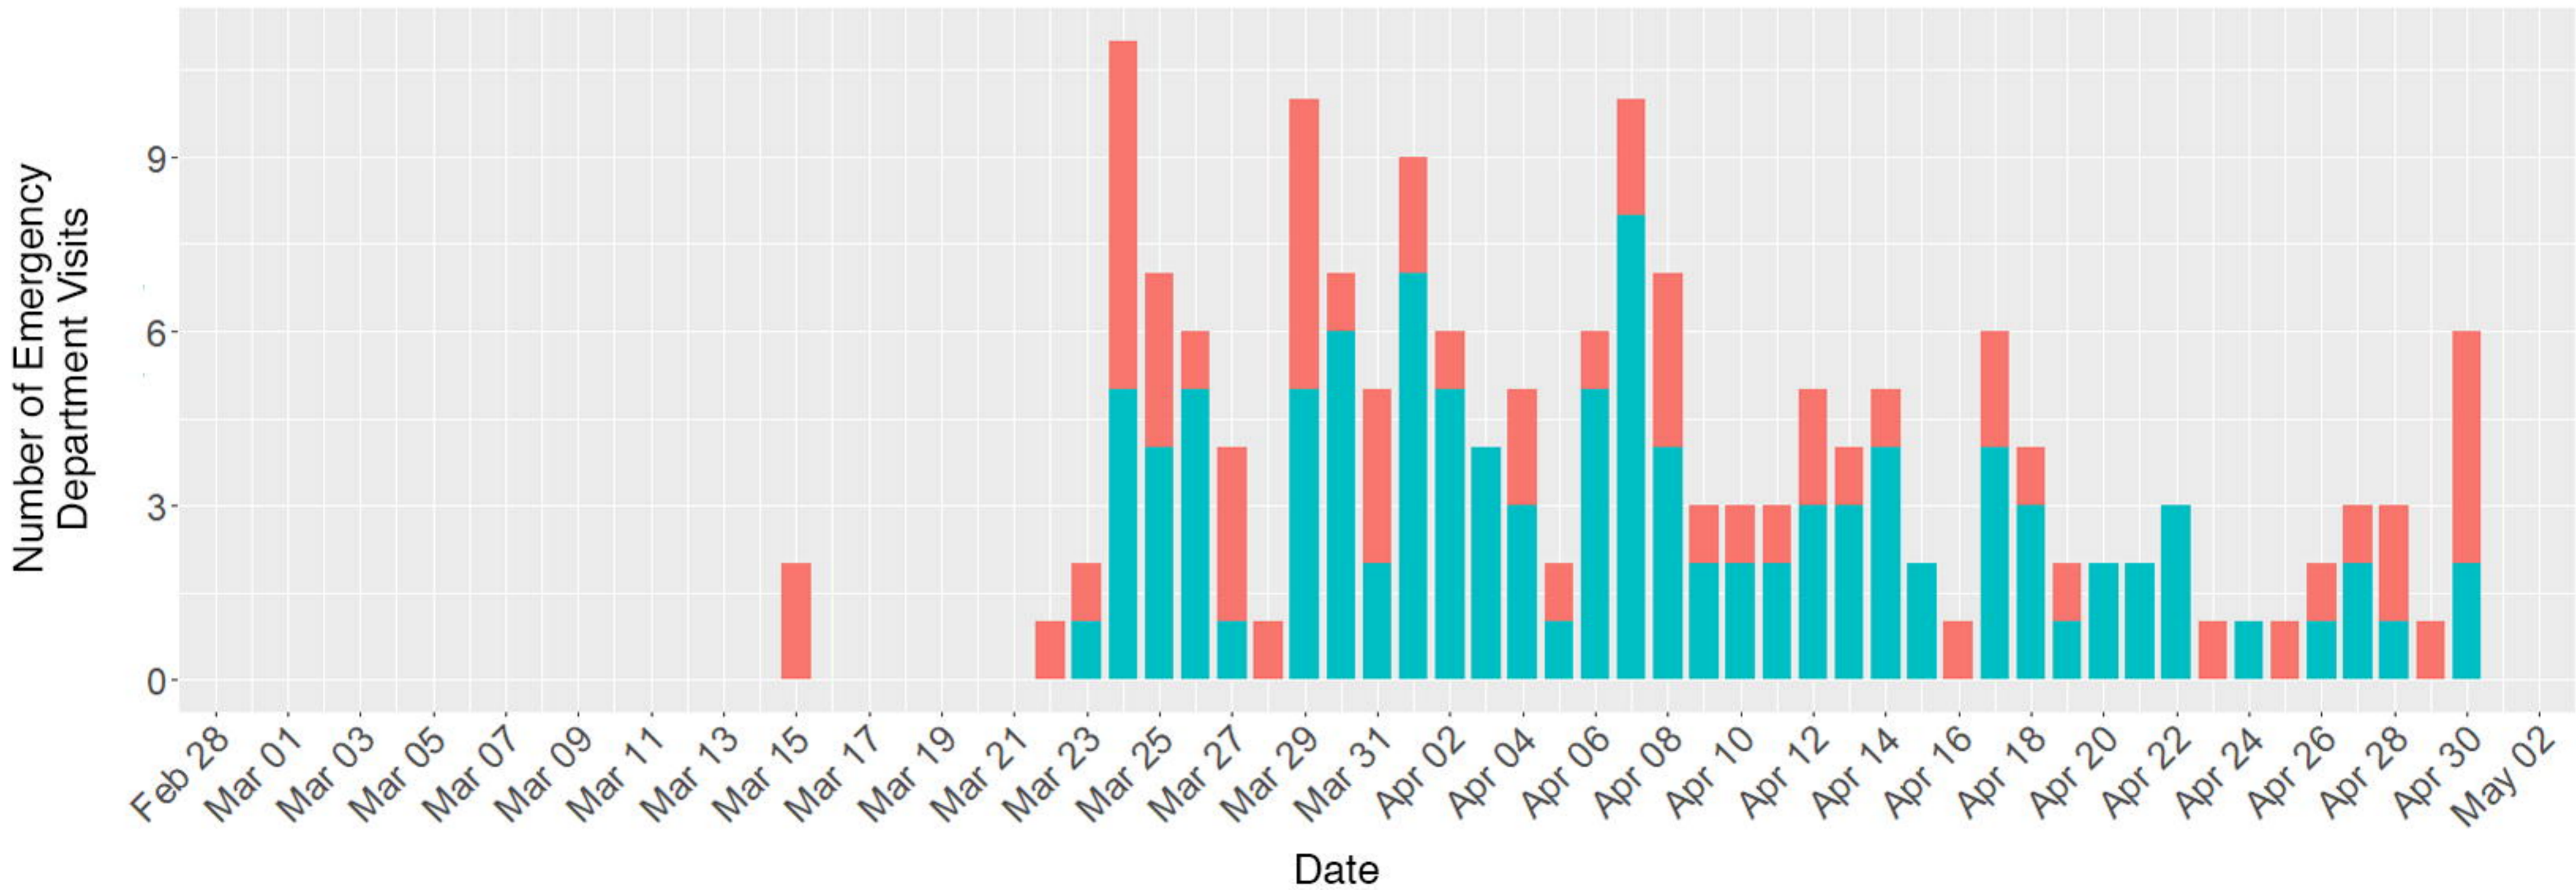

■ Without fever, cough, shortness of breath, or sore throat
 ■ With fever, cough, shortness of breath, or sore throat
